# Supplementary material
Source: bioRxiv or medRxiv preprint supplement (https://medrxiv.org/highwire/filestream/83574/field_highwire_adjunct_files/0/2020.05.28.20116145-1.pdf)
Supplement: Supplementary file [file 2020.05.28.20116145-1.pdf]

## Supplementary Appendix

### Disease Classification Criteria

Patients satisfying the criteria for moderate or severe disease as defined by Israel's Ministry of Health were referred for further care in tertiary hospitals. Criteria for referral to hospital care from the IDF-MC rehabilitation center:

- (1) Change in consciousness or confusion
- (2) Suspected septic shock
- (3) Need for respiratory support –
  - a. A patient requiring oxygen support
  - b. Oxygen saturation <92% or a persistent decrease of 2% from a previous measurement
- (4) Gastrointestinal symptoms including -
  - a. Six or more episodes of diarrhea per day
  - b. Three or more episodes of vomiting per day
  - c. Inability to eat or drink
- (5) Deteriorating vital signs including -
  - a. Fever > 39° C despite antipyretic therapy
  - b. Heart rate above 125 beats per minute
  - c. Respiratory rate greater than 24 per minute

**Table S1 – Patient comorbidities in the study population**

| Patient comorbidities (N,%) |            |
|-----------------------------|------------|
| No significant history      | 67 (56.3%) |
| Asthma                      | 10 (8.4%)  |
| G6PD                        | 9 (7.6%)   |
| Underweight                 | 5 (4.2%)   |
| ADHD                        | 4 (3.4%)   |
| Atopy/Allergic Rhinitis     | 3 (2.5%)   |
| Obesity                     | 3 (2.5%)   |
| Hypothyroidism              | 2 (1.7%)   |

|                              |          |
|------------------------------|----------|
| Psoriasis                    | 2 (1.7%) |
| Irritable Bowel Syndrome     | 2 (1.7%) |
| Scoliosis                    | 2 (1.7%) |
| Severe Migraine              | 2 (1.7%) |
| Iron Deficiency Anemia       | 2 (1.7%) |
| Pericarditis                 | 1 (0.8%) |
| Angioedema                   | 1 (0.8%) |
| Multiple Sclerosis           | 1 (0.8%) |
| Epilepsy                     | 1 (0.8%) |
| Hepatitis B                  | 1 (0.8%) |
| Thalassemia                  | 1 (0.8%) |
| S/P Appendectomy             | 1 (0.8%) |
| Familial Mediterranean Fever | 1 (0.8%) |
| S/P Meniscectomy             | 1 (0.8%) |
| S/P Myringoplasty            | 1 (0.8%) |
| S/P Inguinal Hernia Repair   | 1 (0.8%) |
| Peritonsillar Abscess        | 1 (0.8%) |
| Uveitis                      | 1 (0.8%) |
| Renal Pelvis Dilation        | 1 (0.8%) |
| Unilateral Renal Failure     | 1 (0.8%) |
